# Supplementary material for: An evaluation of costs associated with overall organ damage in patients with systemic lupus erythematosus in the United States
Source: PubMed Central journal article supplement — Lupus. 2022 Jan 21;31(2):202–11. doi: 10.1177/09612033211073670 (PMC8988287; doi:10.1177/09612033211073670), 2022-01-21
Supplement: sj-pdf-1-lup-10.1177_09612033211073670.pdf [file sj-pdf-1-lup-10.1177_09612033211073670.pdf]

## Supplementary material

**Supplementary Table.** Medication class and generic names of systemic lupus erythematosus-related medications

| Medication Class                       | Generic Name                                           |
|----------------------------------------|--------------------------------------------------------|
| Antimalarials                          | Artemether/Lumefantrine                                |
|                                        | Atovaquone/Proguanil HCL                               |
|                                        | Chloroquine                                            |
|                                        | Halofantrine HCL                                       |
|                                        | Hydroxychloroquine Sulfate                             |
|                                        | Mefloquine HCL                                         |
|                                        | Primaquine Phosphate                                   |
|                                        | Pyrimethamine                                          |
|                                        | Pyrimethamine/Sulfadoxine                              |
|                                        | Quinine Sulfate                                        |
| Oral Corticosteroids                   | Betamethasone                                          |
|                                        | Cortisone Acetate                                      |
|                                        | Dexamethasone                                          |
|                                        | Fludrocortisone Acetate                                |
|                                        | Hydrocortisone                                         |
|                                        | Methylprednisolone                                     |
|                                        | Prednisolone                                           |
|                                        | Prednisone                                             |
| Triamcinolone                          |                                                        |
| Intravenous/Injectable Corticosteroids | Betamethasone Acetate/Sodium Phosphate                 |
|                                        | Norflurane HFC                                         |
|                                        | Betamethasone Acetate / Betamethasone Sodium Phosphate |
|                                        | Cortisone Acetate                                      |
|                                        | Dexamethasone                                          |
|                                        | Dexamethasone Phosphate/Lidocaine HCL                  |
|                                        | Hydrocortisone                                         |
|                                        | Methylprednisolone Acetate                             |
|                                        | Methylprednisolone Sodium Succinate                    |
|                                        | Prednisone Acetate                                     |
|                                        | Prednisolone Acetate                                   |
|                                        | Triamcinolone Acetonide                                |
| Triamcinolone Acetonide/Lidocaine HCL  |                                                        |
| Triamcinolone                          |                                                        |
| Immunosuppressive Agents               | Azathioprine                                           |

|        |                                                        |
|--------|--------------------------------------------------------|
|        | Basiliximab                                            |
|        | Belatacept                                             |
|        | Chlorambucil                                           |
|        | Cyclophosphamide                                       |
|        | Cyclosporine                                           |
|        | Daclizumab                                             |
|        | Everolimus                                             |
|        | Leflunomide                                            |
|        | Mechlorethamine (Nitrogen Mustard)                     |
|        | Methotrexate                                           |
|        | Muromonab-CD3                                          |
|        | Mycophenolate Mofetil                                  |
|        | Rituximab                                              |
|        | Sirolimus                                              |
|        | Tacrolimus                                             |
| NSAIDs | Bromfenac Sodium                                       |
|        | Celecoxib                                              |
|        | Celecoxib/Capsaicin/Menthol                            |
|        | Celecoxib/Lidocaine/Menthol                            |
|        | Chlorpheniramine Maleate/Phenylephrine HCL/Ibuprofen   |
|        | Chlorpheniramine Maleate/Pseudoephedrine HCL/Ibuprofen |
|        | Diclofenac                                             |
|        | Etodolac                                               |
|        | Fenoprofen Calcium                                     |
|        | Flurbiprofen                                           |
|        | Hydrocodone/Ibuprofen                                  |
|        | Ibuprofen                                              |
|        | Ibuprofen/Diphenhydramine                              |
|        | Ibuprofen/Famotidine                                   |
|        | Ibuprofen/Oxycodone HCL                                |
|        | Ibuprofen/Phenylephrine HCL                            |
|        | Ibuprofen/Pseudoephedrine HCL                          |
|        | Indomethacin                                           |
|        | Ketoprofen                                             |
|        | Ketorolac Tromethamine                                 |
|        | Lansoprazole/Naproxen                                  |
|        | Meclofenamate Sodium                                   |
|        | Mefenamic Acid                                         |
|        | Meloxicam                                              |
|        | Nabumetone                                             |
|        | Naproxen                                               |
|        | Naproxen Sodium/Pseudoephedrine HCL                    |
|        | Naproxen/Capsaicin/Menthol                             |
|        | Naproxen/Capsaicin/Menthol/Methyl Salicylate           |

|  |                                          |
|--|------------------------------------------|
|  | Nepafenac                                |
|  | Oxaprozin                                |
|  | Phenylephrine HCL/Ketorolac tromethamine |
|  | Piroxicam                                |
|  | Rofecoxib                                |
|  | Sulindac                                 |
|  | Sumatriptan Succinate/Naproxen Sodium    |
|  | Suprofen                                 |
|  | Tolmetin Sodium                          |
|  | Valdecoxib                               |
